# Supplementary material for: Synaptic vesicle pools are a major hidden resting metabolic burden of nerve terminals
Source: PubMed Central journal article supplement (PMC8641928; doi:10.1126/sciadv.abi9027), 2021-12-03
Supplement: sciadv.abi9027_sm.pdf [file sciadv.abi9027_sm.pdf]

Supplementary Materials for  
**Synaptic vesicle pools are a major hidden resting metabolic burden of  
nerve terminals**

Camila Pulido and Timothy A. Ryan\*

\*Corresponding author. Email: [taryan@med.cornell.edu](mailto:taryan@med.cornell.edu)

Published 3 December 2021, *Sci. Adv.* 7, eabi9027 (2021)  
DOI: [10.1126/sciadv.abi9027](https://doi.org/10.1126/sciadv.abi9027)

**This PDF file includes:**

Figs. S1 to S6

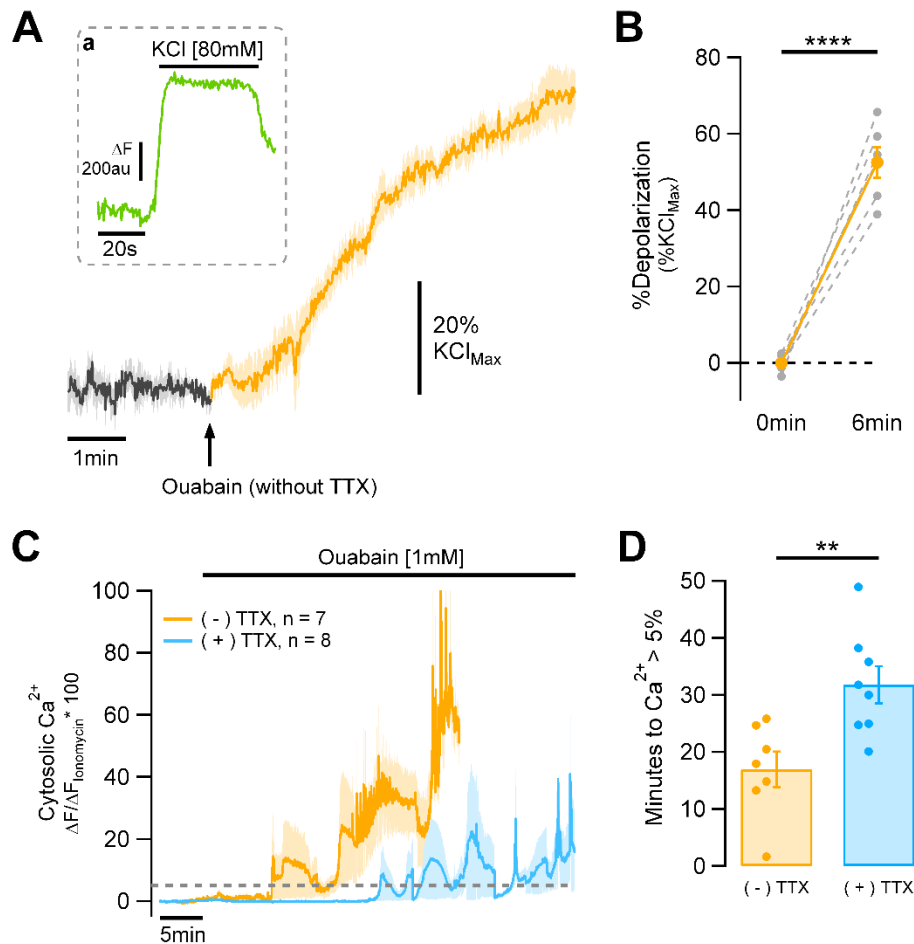

**Fig S1. Inhibition of  $Na^+/K^+$  pump by ouabain causes a rapid membrane depolarization but not an immediate raise in cytosolic  $Ca^{2+}$  at nerve terminals.** **A** and **B** Membrane potential measured in the absence of TTX from synaptic boutons expressing Arclight. **A**, Average Arclight trace of WT neurons before (black trace) and after addition of 1mM ouabain (orange trace). Inverted fluorescence expressed as a percentage of the maximal (inverted) fluorescence change on perfusion with 80mM KCl per neuron. **a**, Representative Arclight trace showing fluorescent plateau upon application of 80mM KCl. **B**, Ouabain causes a rapid fluorescence change associated with depolarization of the membrane potential (0min =  $-0.1\%KCl_{I_{Max}} \pm 0.9$  vs 6min:  $52.51\%KCl_{I_{Max}} \pm 4.03$ ; n = 6, \*\*\*\*p < 0.0001). **C**, Average GCaMP6f trace of WT neurons in presence (orange trace, n = 7) or absence of TTX (blue trace, n = 8) before and after perfusion with 1mM ouabain. Fluorescence expressed as a percentage of the maximal  $\Delta F$  from Ionomycin treatment.  $\pm$  SEM intervals are indicated by shaded colored areas. Dashed gray line indicates 5% level. **D**, Ouabain application does not cause an immediate raise in the

cytosolic free  $\text{Ca}^{2+}$ . Ouabain is applied for several minutes before cytosolic  $\text{Ca}^{2+}$  levels exceed 5% of the maximal  $\Delta F$  from Ionomycin treatment in neurons treated with TTX (blue dots) or without TTX (orange dots), respectively as:  $31.8\text{min} \pm 3.24$  and  $17\text{min} \pm 3.1$ . Error bars indicate SEM.  $**p < 0.01$ , Wilcoxon-Mann-Whitney test.

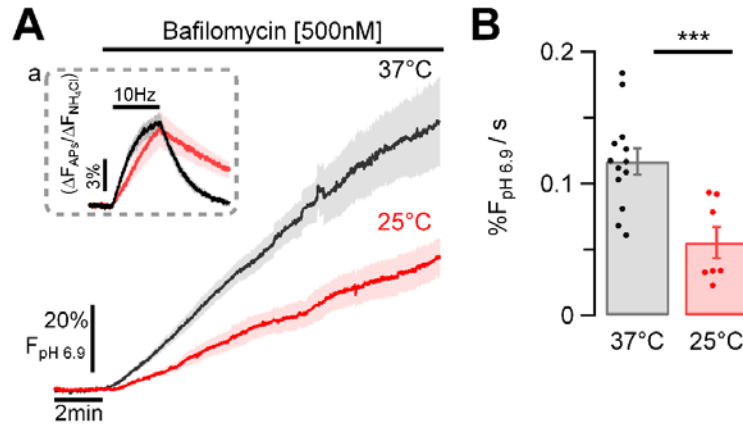

**Fig S2. H<sup>+</sup> efflux is temperature dependent.** H<sup>+</sup> flux from synaptic vesicles measured in hippocampal neurons expressing vG-pH. **A**, Average vG-pH traces of control neurons at either 37°C or at 25°C in presence of TTX before and after perfusion with bafilomycin. Fluorescence expressed as a percentage of the maximum fluorescence change expected for pH = 6.9 (%F<sub>pH 6.9</sub>) based on perfusion with NH<sub>4</sub>Cl (see methods) ± SEM intervals are indicated by shaded colored areas. **a**, Average vG-pH traces in response to 100APs. **B**, Lowering the temperature from 37°C to 25°C reduced the SV H<sup>+</sup> efflux rate by a factor of ~2. (37°C: 0.117% F<sub>pH 6.9</sub>/s ± 0.01 (n = 13) vs 25°C: 0.055% F<sub>pH 6.9</sub>/s ± 0.012 (n = 7)). Error bars indicate SEM. \*\*\*p < 0.001, Wilcoxon-Mann-Whitney test.

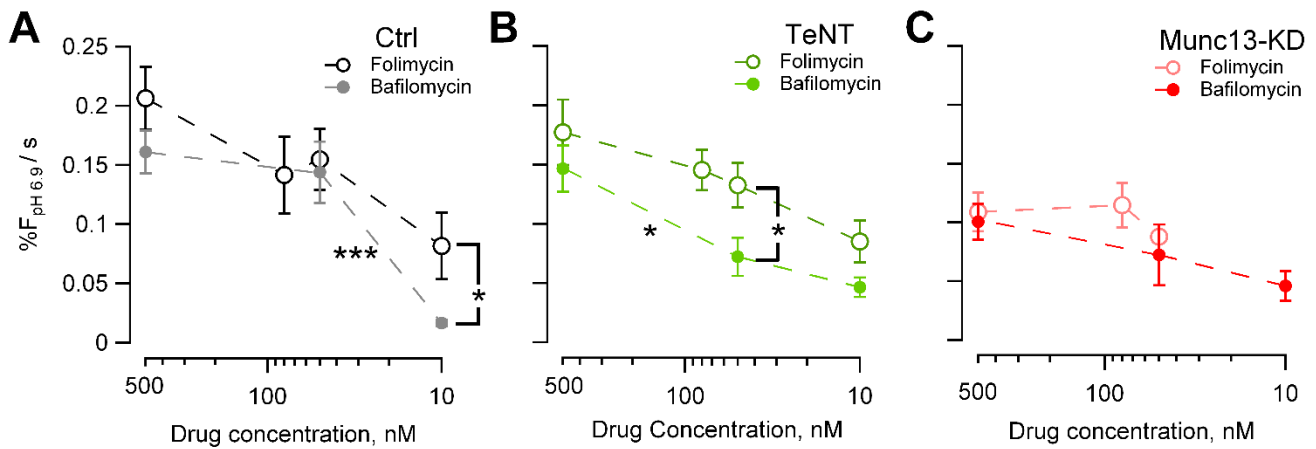

**Fig S3. Unmasking SV H<sup>+</sup> efflux depends on ATPase block.** SV H<sup>+</sup> efflux from synaptic vesicles expressing vG-pH measured in the absence of TTX and at different concentration of bafilomycin (close symbols) or folimycin (open symbols). Concentration ranged from 10nM – 500nM. **A**, Control neurons. In bafilomycin control (gray line, close symbols), H<sup>+</sup> flux change from 50nM to 500nM was not significant different (50nM: 0.14%F<sub>pH6.9</sub>/s ± 0.025 (n = 9) vs 500nM: 0.16%F<sub>pH6.9</sub>/s ± 0.017 (n = 11); n.s. p = 0.6), therefore, we used 500nM as the effective V-ATPase blockage to measure SV H<sup>+</sup> efflux. **B** and **C**, Neurons where exocytosis was genetically suppressed. **B**, Neurons expressing tetanus toxin light chain (TeNT). **C**, Neurons suppressing expression of Munc13 (Munc13-KD). Error bars indicate SEM. \*p < 0.05, \*\*\*p < 0.001, Wilcoxon-Mann-Whitney test.

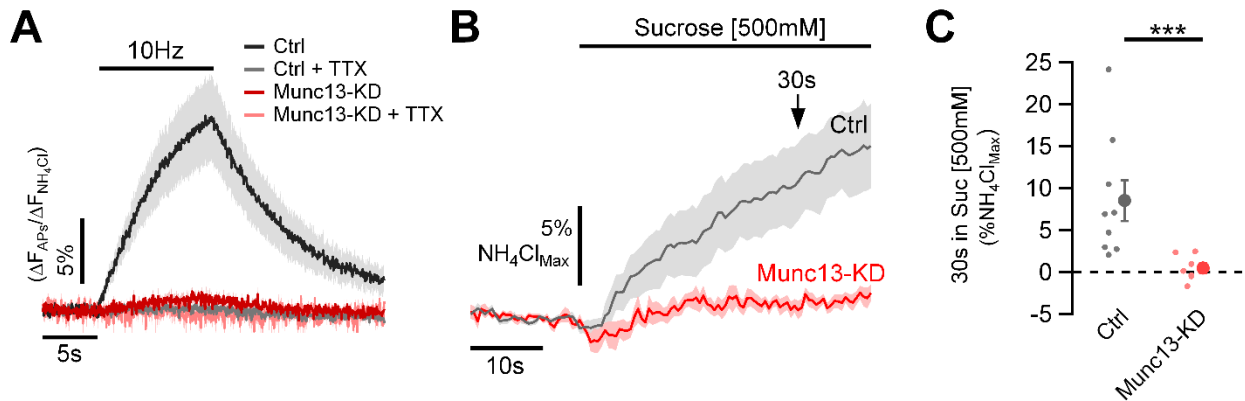

**Fig S4. Spontaneous synaptic vesicle exocytosis is suppressed in Munc13-KD neurons.**

Spontaneous release measured from synaptic vesicles expressing vG-pH upon addition of a hypertonic solution (Sucrose [500mM]). **A**, Average vG-pH traces in response to 100APs (10Hz) in control neurons (Ctrl, black trace,  $n = 9$ ) or in neurons where exocytosis is genetically suppressed by ablating expression of Munc13 (Munc13-KD, red trace,  $n = 7$ ), before (dark color tone) and after addition of TTX (light color tone).  $\Delta F$  values are normalized to maximal  $\Delta F$  from  $NH_4Cl$  treatment ( $\Delta F / \Delta F_{NH_4Cl}$ ). **B**, vG-pH average traces of Ctrl and Munc13-KD neurons measured in presence of TTX before and after perfusion with Sucrose [500mM]. Fluorescence expressed as a percentage of the maximal  $\Delta F$  from  $NH_4Cl$  treatment.  $\pm$  SEM intervals are indicated by shaded colored areas. **C**, Hypertonic sucrose application increases the rate of spontaneous exocytosis in control neurons as measured with vG-pH fluorescence (normalized to  $\Delta F_{NH_4Cl}$ ) but not in Munc13-KD neurons.

Percentage of fluorescent increase in Ctrl and Munc13-KD neurons measured 30s after application of sucrose, respectively as:  $8.54\%NH_4Cl_{Max} \pm 2.4$  and  $0.48\%NH_4Cl_{Max} \pm 0.58$ . Error bars indicate SEM.

\*\*\* $p < 0.001$ , Wilcoxon-Mann-Whitney test.

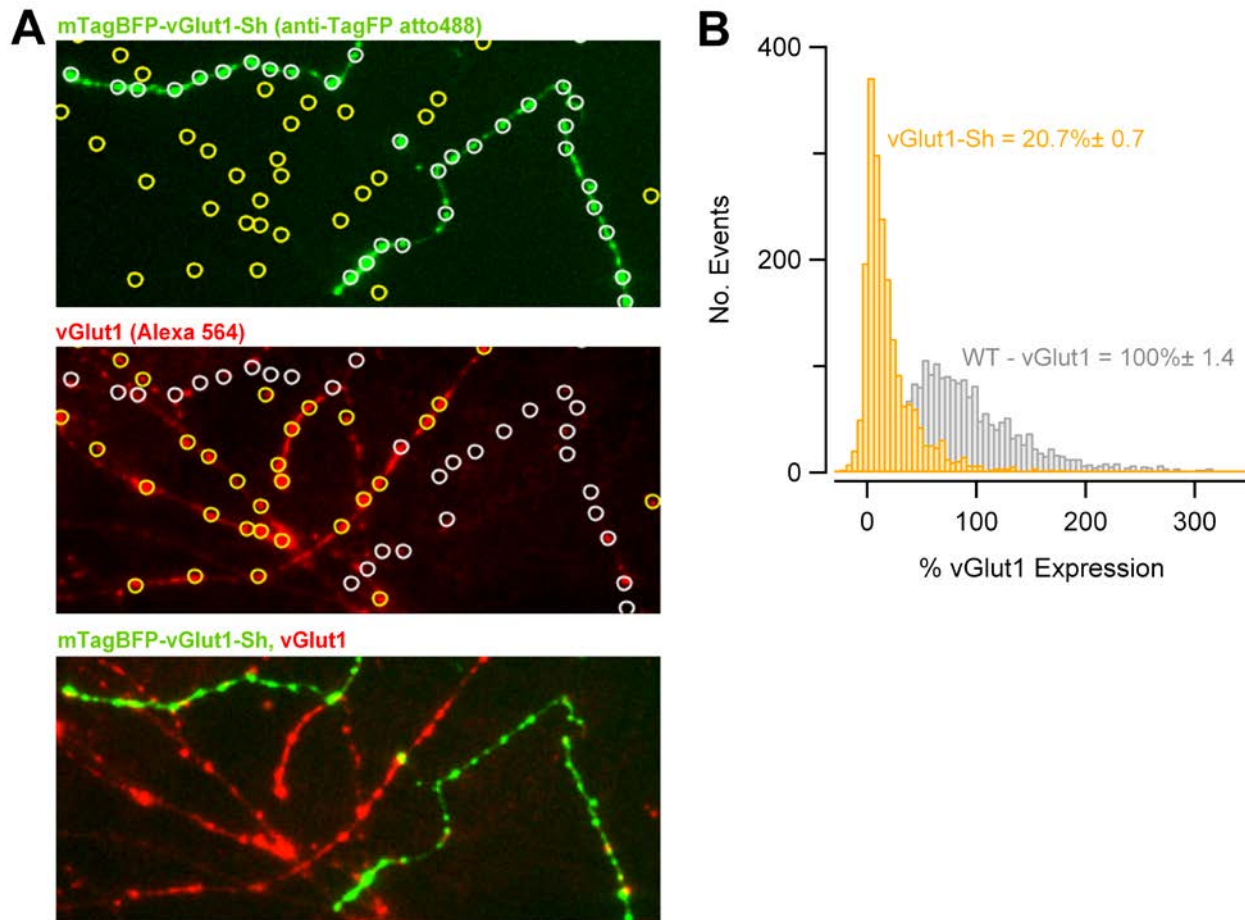

**Fig S5. Expression of a ShRNA targeting vGlut1 resulted in ~80% suppression of vGlut1 expression.** **A**, Representative presynaptic boutons from a neuron expressing an mTagBFP-vGlut1-Sh (stained with FlutoTag-X2 anti-TagFP Atto488). BFP-positive boutons (white circles) show much lower vGlut1 immunofluorescence when compared with neighboring non-transfected boutons (yellow circles). **B** Distribution of vGlut1 expression in boutons transfected with mTagBFP-vGlut1-Sh ( $n = 2050$ ) normalized to their respective neighboring non-transfected boutons ( $n = 1904$ ) from 24 neurons. Respectively as: mean  $\pm$  SEM:  $20.7\% \pm 0.7$  vs  $100\% \pm 1.4$ .

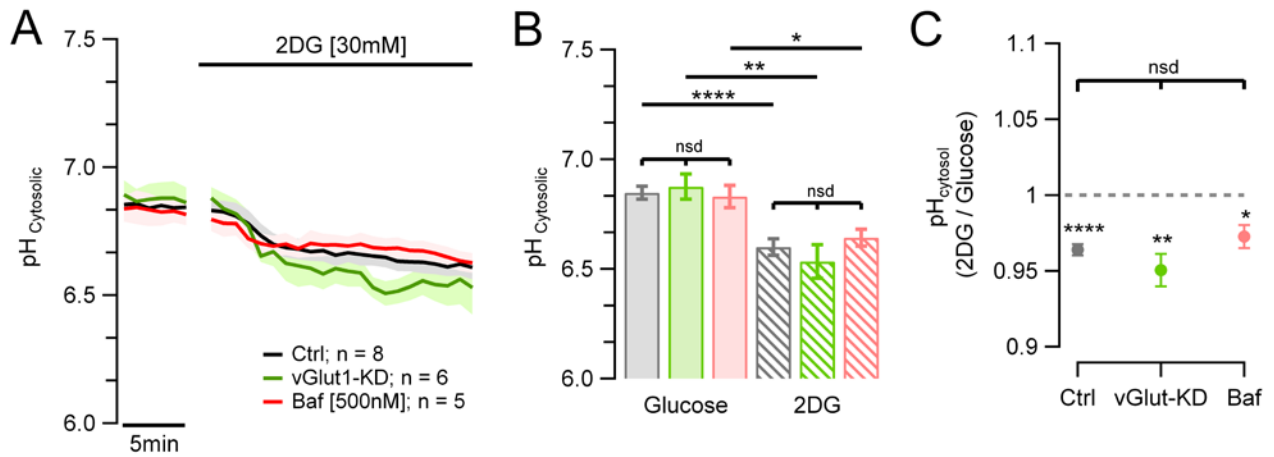

**Fig S6. Changes in cytosolic pH during 2DG perfusion is similar in vGlut1-KD neurons or during bafilomycin treatment.** Cytosolic pH measurements from hippocampal neurons expressing a cytoplasmic pHluorin. **A**, Average cytosolic pH traces in WT neurons in control (n = 8), in Bafilomycin (n = 5) and vGlut1-KD (n = 6) in presence of glucose (first 5min) and 2DG. **B**, 2DG causes a cytosolic pH decrease, as previously reported (1). Ctrl: pH<sub>Glucose</sub> 6.85 ± 0.03 vs pH<sub>2DG</sub> 6.6 ± 0.04 (n = 8; p < 0.0001); bafilomycin: pH<sub>Glucose</sub> 6.83 ± 0.04 vs pH<sub>2DG</sub> 6.64 ± 0.04 (n = 5; p < 0.02); vGlut1-KD: pH<sub>Glucose</sub> 6.87 ± 0.04 vs pH<sub>2DG</sub> 6.53 ± 0.08 (n = 6; p < 0.005). **C**, Similar pH decrease was observed in control, vGlut1-KD and bafilomycin neurons.
